# Supplementary material
Source: PubMed Central journal article supplement (PMC6178799)
Supplement: NIHMS991235-supplement-Supplemental_Materials.pdf [file NIHMS991235-supplement-Supplemental_Materials.pdf]

## Supplemental digital content 1.

| Supplementary Table 1A: Baseline Participant Characteristics by 24-Month Follow-Up |                  |                |               |         |                  |                |               |         |
|------------------------------------------------------------------------------------|------------------|----------------|---------------|---------|------------------|----------------|---------------|---------|
|                                                                                    | CN               |                |               |         | EMCI             |                |               |         |
|                                                                                    | With 24 mo Visit | No 24 mo Visit | F or $\chi^2$ | p-value | With 24 mo Visit | No 24 mo Visit | F or $\chi^2$ | p-value |
| <b>N</b>                                                                           | 363              | 55             | -             | -       | 242              | 66             | -             | -       |
| <b>Age (years)</b>                                                                 | 74.9±5.8         | 73.7±5.3       | 1.803         | 0.180   | 71.0±7.3         | 72.0±8.1       | 0.882         | 0.348   |
| <b>Sex (% male)</b>                                                                | 53.0             | 30.9           | 9.233         | 0.002*  | 55.6             | 51.5           | 0.545         | 0.460   |
| <b>Education (years)</b>                                                           | 16.4±2.7         | 15.7±3.0       | 2.605         | 0.107   | 16.1±2.6         | 15.4±2.7       | 3.162         | 0.076   |
| <b>APOE Genotype (%)</b>                                                           | -                | -              | 0.322         | 0.851   | -                | -              | 3.421         | 0.181   |
| <i><math>\epsilon 4 -</math></i>                                                   | 72.1             | 75.5           | -             | -       | 56.0             | 59.7           | -             | -       |
| <i><math>\epsilon 4 +</math></i>                                                   | 25.1             | 22.6           | -             | -       | 35.7             | 38.7           | -             | -       |
| <i><math>\epsilon 4/\epsilon 4 +</math></i>                                        | 2.8              | 1.9            | -             | -       | 8.3              | 1.6            | -             | -       |
| <b>PSD (%)</b>                                                                     | 10.9             | 16.5           | 1.135         | 0.287   | 33.3             | 39.7           | 0.881         | 0.348   |
| <b>Sedative/Hypnotic before conversion (%)</b>                                     | 7.4              | 9.1            | 0.185         | 0.667   | 14               | 11             | 0.421         | 0.516   |
| <b>CDRsb</b>                                                                       | 0.0±0.13         | 0.0±0.15       | 0.422         | 0.516   | 1.2±0.7          | 1.5±0.8        | 4.679         | 0.031*  |
| <b>ADAS-11</b>                                                                     | 5.9±2.9          | 6.8±3.6        | 4.563         | 0.033*  | 7.8±3.3          | 8.2±4.2        | 0.628         | 0.429   |
| <b>Comorbid Diagnoses</b>                                                          |                  |                |               |         |                  |                |               |         |
| Hypertension(%)                                                                    | 43.8             | 56.4           | 3.040         | 0.081   | 48.3             | 48.5           | 0.000         | 0.984   |
| Diabetes(%)                                                                        | 6.6              | 12.7           | 2.602         | 0.107   | 11.2             | 9.1            | 0.231         | 0.630   |
| CAD (%)                                                                            | 2.8              | 5.5            | 1.155         | 0.282   | 3.3              | 3.0            | 0.013         | 0.911   |
| <b>GDS</b>                                                                         | 0.8±1.1          | 0.8±1.1        | 0.005         | 0.943   | 1.8±1.5          | 1.9±1.6        | 2.410         | 0.121   |

mo = month, PSD = positive sleep disturbance, CDRsb = Clinical Dementia Rating Scale - Sum of Boxes Score, ADAS-11 = Alzheimer's Disease Assessment Scale-Cognitive Subscale, CAD = Coronary Artery Disease, GDS = Geriatric Depression Scale, continuous outcomes presented as mean±standard deviation, F-value from ANOVA,  $\chi^2$  from chi-square test, \*p < .05

| Supplementary Table 1B: Baseline Participant Characteristics by 24-Month Follow-Up |                  |                |               |         |                  |                |               |         |
|------------------------------------------------------------------------------------|------------------|----------------|---------------|---------|------------------|----------------|---------------|---------|
|                                                                                    | LMCI             |                |               |         | AD               |                |               |         |
|                                                                                    | With 24 mo Visit | No 24 mo Visit | F or $\chi^2$ | p-value | With 24 mo Visit | No 24 mo Visit | F or $\chi^2$ | p-value |
| <b>N</b>                                                                           | 430              | 131            | -             | -       | 171              | 171            | -             | -       |
| <b>Age (years)</b>                                                                 | 73.8±7.6         | 74.5±7.7       | 0.877         | 0.349   | 75.3±7.7         | 74.6±7.8       | 0.737         | 0.391   |
| <b>Sex (% male)</b>                                                                | 60.5             | 63.4           | 0.354         | 0.552   | 53.8             | 56.7           | 0.296         | 0.587   |
| <b>Education (years)</b>                                                           | 16.0±2.8         | 15.4±3.2       | 3.712         | 0.055   | 14.8±3.1         | 15.6±2.8       | 6.249         | 0.013*  |
| <b>APOE Genotype (%)</b>                                                           | -                | -              | 0.067         | 0.967   | -                | -              | 4.115         | 0.125   |
| <i><math>\epsilon 4 -</math></i>                                                   | 45.6             | 45.7           | -             | -       | 28.7             | 38.9           | -             | -       |
| <i><math>\epsilon 4 +</math></i>                                                   | 41.2             | 41.9           | -             | -       | 51.5             | 42.5           | -             | -       |
| <i><math>\epsilon 4/\epsilon 4 +</math></i>                                        | 13.3             | 12.4           | -             | -       | 19.9             | 18.6           | -             | -       |
| <b>PSD (%)</b>                                                                     | 30.5             | 34.9           | 0.848         | 0.357   | 38.6             | 50.9           | 5.216         | 0.022*  |
| <b>Sedative/Hypnotic before conversion (%)</b>                                     | 6.7              | 3.8            | 1.511         | 0.219   | 6.4              | 5.8            | 0.051         | 0.822   |
| <b>CDRsb</b>                                                                       | 1.7±0.9          | 1.6±0.9        | 0.054         | 0.8     | 4.3±1.6          | 4.5±1.7        | 0.634         | 0.4     |
| <b>ADAS-11</b>                                                                     | 11.3±4.5         | 12.1±4.9       | 2.425         | 0.120   | 18.5±6.1         | 20.3±7.5       | 5.795         | 0.017*  |
| <b>Comorbid Diagnoses</b>                                                          |                  |                |               |         |                  |                |               |         |
| Hypertension(%)                                                                    | 48.1             | 50.4           | 0.202         | 0.653   | 51.5             | 49.1           | 0.187         | 0.665   |
| Diabetes(%)                                                                        | 7.9              | 9.2            | 0.210         | 0.647   | 6.4              | 12.9           | 4.058         | 0.044*  |
| CAD (%)                                                                            | 4.0              | 3.8            | 0.005         | 0.944   | 2.9              | 2.3            | 0.114         | 0.736   |
| <b>GDS</b>                                                                         | 1.6±1.3          | 1.8±1.5        | 1.915         | 0.167   | 1.7±1.4          | 1.6±1.5        | 0.069         | 0.793   |

mo = month, PSD = positive sleep disturbance, CDRsb = Clinical Dementia Rating Scale - Sum of Boxes Score, ADAS-11 = Alzheimer's Disease Assessment Scale-Cognitive Subscale, CAD = Coronary Artery Disease, GDS = Geriatric Depression Scale, continuous outcomes presented as mean±standard deviation, F-value from ANOVA,  $\chi^2$  from chi-square test, \*p < .05

| <b>Supplemental Table 2: Significant Contributors to Variance in Cognition over Time</b> |                                  |                              |                           |                |                                                                           |
|------------------------------------------------------------------------------------------|----------------------------------|------------------------------|---------------------------|----------------|---------------------------------------------------------------------------|
|                                                                                          | <b>Main Explanatory Variable</b> | <b>Covariate</b>             | <b>Parameter Estimate</b> | <b>p-value</b> | <b>Interpretation</b>                                                     |
| CN                                                                                       | <b>EF</b>                        | Education x Time             | 0.001                     | 0.048          | Higher education had a slower ADNI-EF decline.                            |
| EMCI                                                                                     | <b>Memory</b>                    | APOE genotype x Time         | -0.009                    | 0.044          | Increasing APOE $\epsilon$ 4 allele number had a faster ADNI-Mem decline. |
|                                                                                          | <b>Memory</b>                    | Age x Time                   | -0.001                    | < 0.005        | Increasing age had a faster ADNI-Mem decline.                             |
|                                                                                          | <b>EF</b>                        | APOE genotype x Time         | -0.012                    | 0.044          | Increasing APOE $\epsilon$ 4 allele number had a faster ADNI-EF decline.  |
| LMCI                                                                                     | <b>Memory</b>                    | APOE genotype x Time         | -0.014                    | <0.005         | Increasing APOE $\epsilon$ 4 allele number had a faster ADNI-Mem decline. |
|                                                                                          | <b>Memory</b>                    | Sex x Time                   | 0.002                     | 0.031          | Men had a slower ADNI-Mem decline compared to women.                      |
|                                                                                          | <b>EF</b>                        | APOE genotype x Time         | -0.009                    | <0.005         | Increasing APOE $\epsilon$ 4 allele number had a faster ADNI-EF decline.  |
|                                                                                          | <b>ADAS11</b>                    | APOE genotype x Time         | 0.114                     | <0.005         | Increasing APOE $\epsilon$ 4 allele number had a faster ADAS-11 increase. |
|                                                                                          | <b>ADAS11</b>                    | Sex x Time                   | 0.05                      | 0.010          | Men had a slower ADAs-11 increase compared to women.                      |
| AD-dementia                                                                              | <b>Memory</b>                    | Age x Time                   | 0.001                     | <0.005         | Increasing age had a slower ADNI-Mem decline.                             |
|                                                                                          | <b>EF</b>                        | Age x Time                   | 0.001                     | <0.005         | Increasing age had a slower ADNI-EF decline.                              |
|                                                                                          | <b>ADAS11</b>                    | Age x Time                   | -0.012                    | <0.005         | Increasing age had a slower ADAS-11 increase.                             |
|                                                                                          | <b>ADAS11</b>                    | Sedative/hypnotic use x Time | 0.253                     | 0.008          | Use of a sedative/hypnotic had a faster ADAS-11 increase.                 |

CN = cognitively normal, EMCI = early Mild Cognitive Impairment, LMCI = late Mild Cognitive Impairment, AD = Alzheimer's disease, EF = executive function, ADAS-11 = Alzheimer's Disease Assessment Scale-Cognitive Subscale, Parameter estimates and p-values are for the listed covariate that was used in the repeated measures linear mixed model.

| <b>Supplemental Table 3A: Effect of Sleep Disturbance on Outcomes of Change in Cognition over Time in Participants without Dementia</b> |                           |                       |
|-----------------------------------------------------------------------------------------------------------------------------------------|---------------------------|-----------------------|
| <b>Outcome</b>                                                                                                                          | <b>Parameter Estimate</b> | <b><i>p</i>-value</b> |
| <b>Memory</b>                                                                                                                           | -0.001                    | 0.221                 |
| <b>EF</b>                                                                                                                               | -0.002                    | 0.417                 |
| <b>ADAS-11</b>                                                                                                                          | 0.125                     | 0.119                 |
|                                                                                                                                         |                           |                       |
| <b>Supplemental Table 3B: Effect of Sleep Disturbance on Risk of Conversion in Participants without Dementia</b>                        |                           |                       |
| <b>Outcome</b>                                                                                                                          | <b>HR (95% CI)</b>        | <b><i>p</i>-value</b> |
| <b>Conversion</b>                                                                                                                       | 0.92 (0.70,1.20)          | 0.917                 |

ADAS-11 = Alzheimer's Disease Assessment Scale-Cognitive Subscale, EF = Executive Function, PE = parameter estimate, HR = Hazard Ratio, CI = Confidence Interval, PEs are for a repeated measures linear mixed effects model, HRs and 95% CIs are for a Cox proportional hazards model

|      | <b>Covariate</b> | <b>HR (95% CI)</b>  | <b>p-value</b> | <b>Interpretation</b>                                                        |
|------|------------------|---------------------|----------------|------------------------------------------------------------------------------|
| CM   | APOE <i>e4</i>   | 1.51 (1.10-2.08)    | 0.011          | Increasing APOE $\epsilon$ 4 allele number had increased risk of conversion. |
|      | APOE <i>e4e4</i> | 4.94 (1.37-17.74)   | 0.014          | Increasing APOE $\epsilon$ 4 allele number had increased risk of conversion. |
|      | ADAS-11 Baseline | 1.18 (1.05-1.34)    | 0.005          | Higher baseline ADAS-11 score had increased risk of conversion.              |
| EMCI | APOE <i>e4</i>   | 12.96 (1.64-102.16) | 0.015          | Increasing APOE $\epsilon$ 4 allele number had increased risk of conversion. |
|      | APOE <i>e4e4</i> | 19.00 (2.13-169.96) | 0.008          | Increasing APOE $\epsilon$ 4 allele number had increased risk of conversion. |
|      | ADAS-11 Baseline | 1.19 (1.02-1.38)    | 0.032          | Higher baseline ADAS-11 score had increased risk of conversion.              |
| LMCI | APOE <i>e4</i>   | 1.51 (1.10-2.08)    | 0.011          | Increasing APOE $\epsilon$ 4 allele number had increased risk of conversion. |
|      | ADAS-11 Baseline | 1.12 (1.08-1.15)    | <0.005         | Higher baseline ADAS-11 score had increased risk of conversion.              |

CN = cognitively normal, EMCI = early Mild Cognitive Impairment, LMCI = late Mild Cognitive Impairment, AD = Alzheimer's disease, EF = executive function, ADAS-11 = Alzheimer's Disease Assessment Scale-Cognitive Subscale, Parameter estimates and p-values are for the listed covariate that was used in the repeated measures linear mixed model.

|    | <b>Outcome</b>       | <b>90% Power</b> | <b>80% Power</b> | <b>70% Power</b> |
|----|----------------------|------------------|------------------|------------------|
| CN | $\Delta$ ADAS11/year | 0.41             | 0.33             | 0.28             |
|    | $\Delta$ EF/year     | 0.044            | 0.036            | 0.031            |

|             |                      |       |       |       |
|-------------|----------------------|-------|-------|-------|
|             | <b>Δ Memory/year</b> | 0.054 | 0.045 | 0.039 |
| EMCI        | <b>Δ ADAS11/year</b> | 0.52  | 0.44  | 0.36  |
|             | <b>Δ EF/year</b>     | 0.057 | 0.048 | 0.039 |
|             | <b>Δ Memory/year</b> | 0.043 | 0.036 | 0.029 |
| LMCI        | <b>Δ ADAS11/year</b> | 0.37  | 0.31  | 0.24  |
|             | <b>Δ EF/year</b>     | 0.036 | 0.029 | 0.024 |
|             | <b>Δ Memory/year</b> | 0.026 | 0.021 | 0.018 |
| AD-dementia | <b>Δ ADAS11/year</b> | 0.87  | 0.69  | 0.59  |
|             | <b>Δ EF/year</b>     | 0.052 | 0.045 | 0.037 |
|             | <b>Δ Memory/year</b> | 0.042 | 0.035 | 0.029 |

CN = cognitively normal, EMCI = early Mild Cognitive Impairment, LMCI = late Mild Cognitive Impairment, AD = Alzheimer's disease, EF = executive function, ADAS11 = Alzheimer's Disease Assessment Scale-Cognitive Subscale

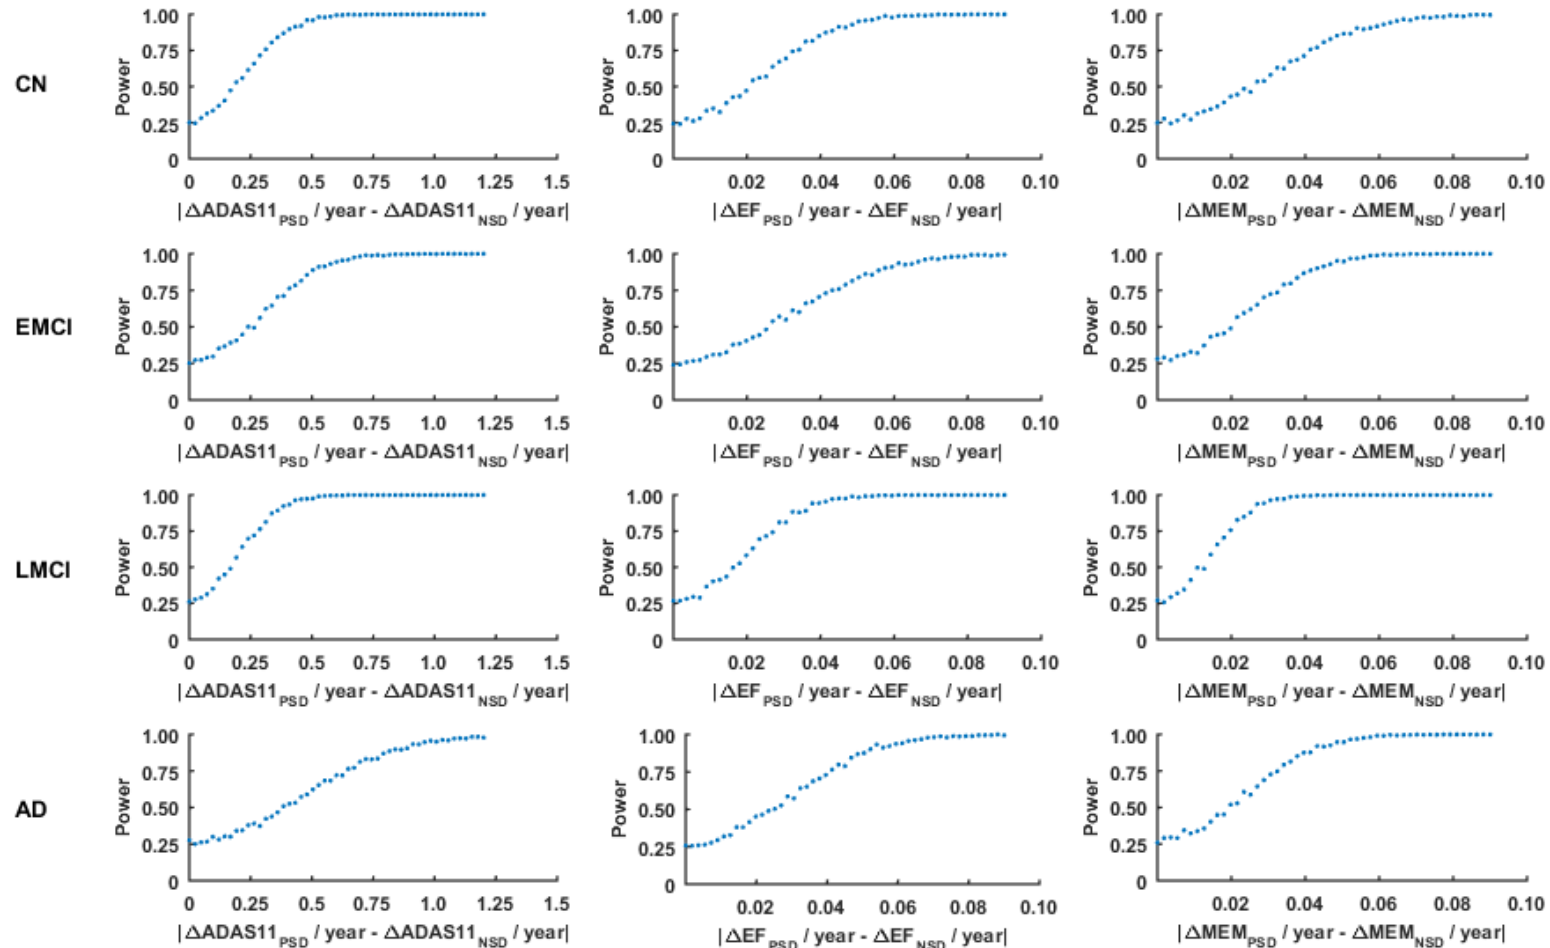

**Supplemental Figure 1: Power analyses performed with simulation for various cognitive outcomes.** Simulations were performed to estimate power over a range of change in cognitive scores per year. CN = cognitively normal, EMCI = early MCI, LMCI = late MCI, AD = Alzheimer's disease, MEM = ADNI memory score, EF = ADNI EF score, ADAS11 = Alzheimer's disease assessment scale-cognitive subscale, PSD = positive sleep disturbance, NSD = negative sleep disturbance
